# Supplementary material for: Alkoxycarbonylation of aryl iodides using gaseous carbon monoxide and pre-pressurized reaction vessels in conjunction with microwave heating
Source: Royal Society of Chemistry journal article supplement (doi:10.1039/b614025d), 2006-11-14
Supplement: b614025d.pdf [file b614025d.pdf]

# Alkoxy carbonylation of aryl iodides using gaseous carbon monoxide and pre-pressurized reaction vessels in conjunction with microwave heating

Chad M. Kormos and Nicholas E. Leadbeater\*

Department of Chemistry, University of Connecticut, 55 North Eagleville Rd, Storrs, CT 06269-3060 USA. E-mail: nicholas.leadbeater@uconn.edu Fax: +1 860 486 2981; Tel: +1 860 486 5076.

## PHOTOGRAPHS OF THE GAS LOADING APPARATUS

A commercially available multimode microwave unit (Anton Paar Synthos 3000) was used for the reactions. More information on the unit and the gas loading attachments can be found at <http://www.anton-paar.com>

10

1) Reaction vessel (in outer jacket) with top and gas loading accessory attached

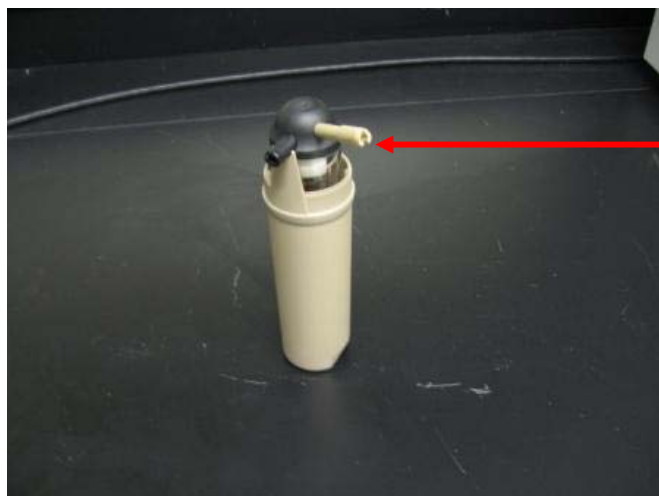

gas loading accessory

15

2) Loading the vessel: Vessel is secured in rotor, vent screw closed and gas introduced via a narrow-gauge tubing with a bayonet fitting which locks into the gas loading accessory. Pressure of gas determined from gas cylinder regulator

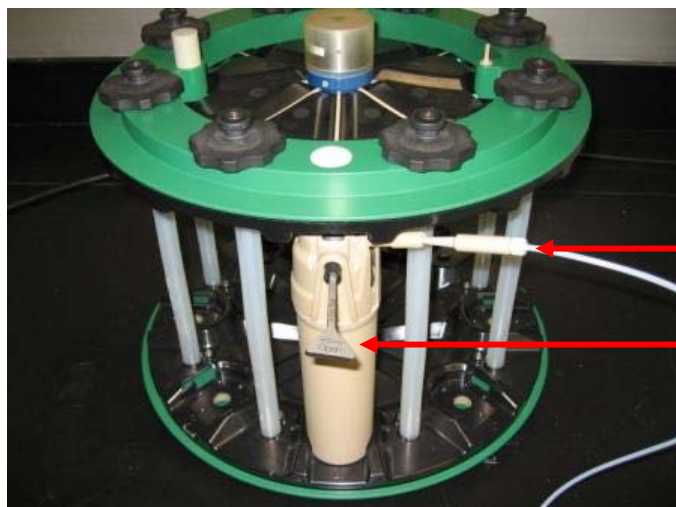

narrow-gauge tubing with a bayonet fitting

vent screw
